# Supplementary material for: In Vitro Screening of Lactic Acid Bacteria with RAW264.7 Macrophages and the Immunoregulatory Mechanism
Source: MDPI journal article supplement (doi:10.3390/pr12050903), 2024-04-29
Supplement: s1 [file s1]

### Supplementary material

Figure S1: Growth curves of strains in group 1, (A) Growth curves of strains AU80, AU78, AU51, AU53, AU58, AU77, AU68, AU38, and AU26, LGG  
(B) Growth curves of strains AU05, AU06, AU04, AU21, AU22, AU28, AU33 and AU77

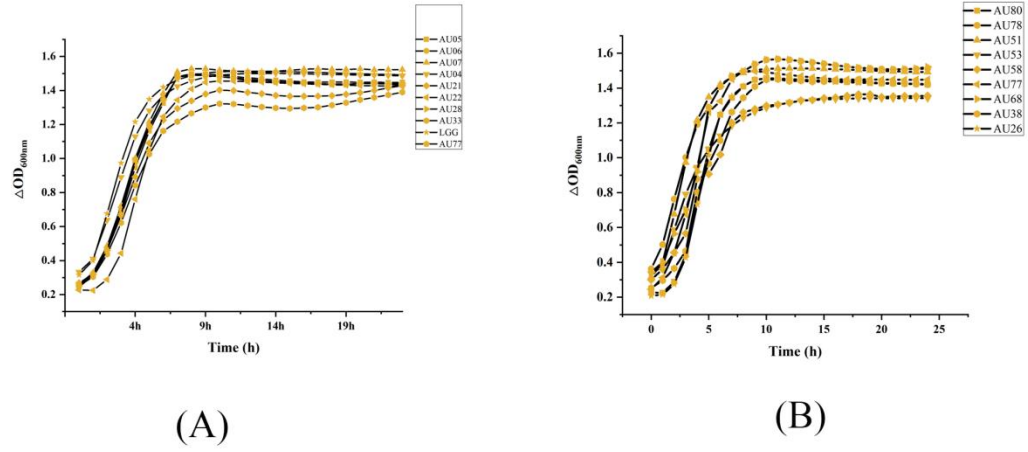

### Title: Growth curves of strains in group 1

Figure S2: (A) Growth curves of strains AU01, AU02, AUc2301, AU11, AU12, AU13, AU14 and AUY2301, (B) Growth curves of strains AU16, AU17, AU18, AU19, AU20, AU37, AU41 and AU44, (C) Growth curves of strains AU42, AU48, AU49, AU50, AU55, AU62, AU71, AU73

Title: Growth curves of strains in group 2

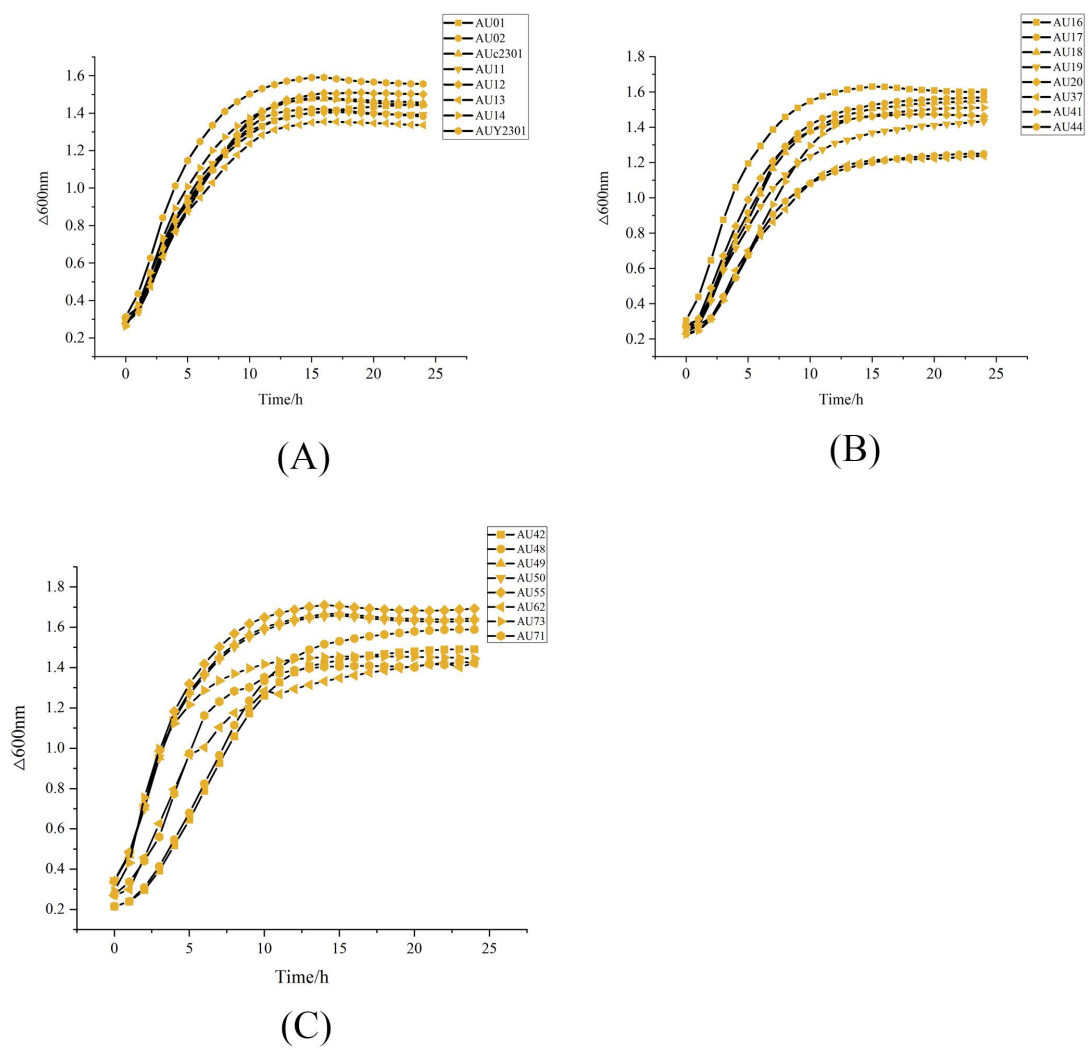

Figure S3 :(A) Growth curves of strains AU08, AU09, AU27, AU30, AU40, AU47, AU54 and AU67,  
(B) Growth curves of strains AU24, AU72, AU74, AU75, AU81, AU82, AU83, AU84.

Title: Growth curves of strains in group 3

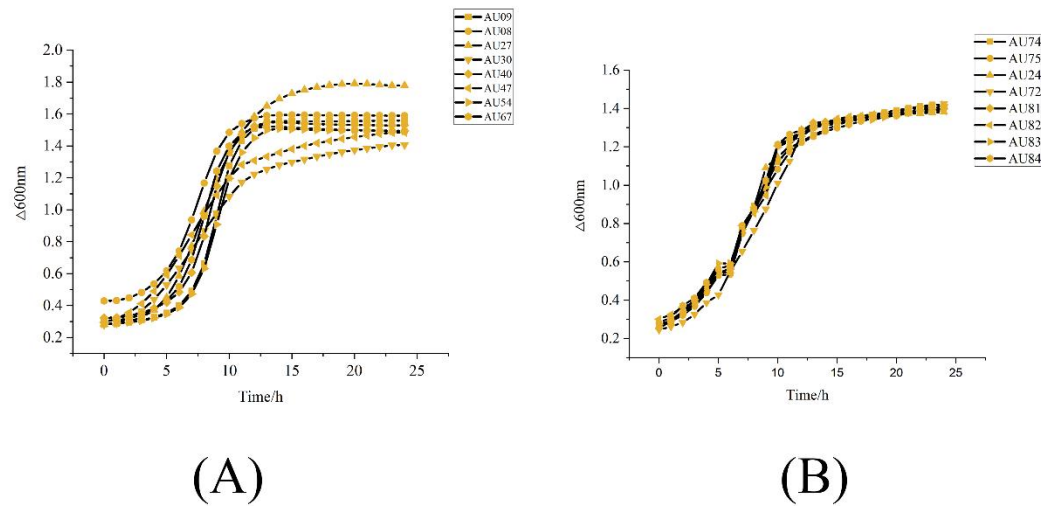

Figure S4: (A) Growth curves of strains AU36, AU25, AU29, AU56,34, AU76 and AU45, (B) Growth curves of strains AU23, AU32, AU31, AU60, AU61 and AU66

Title: Growth curves of strains in group 4

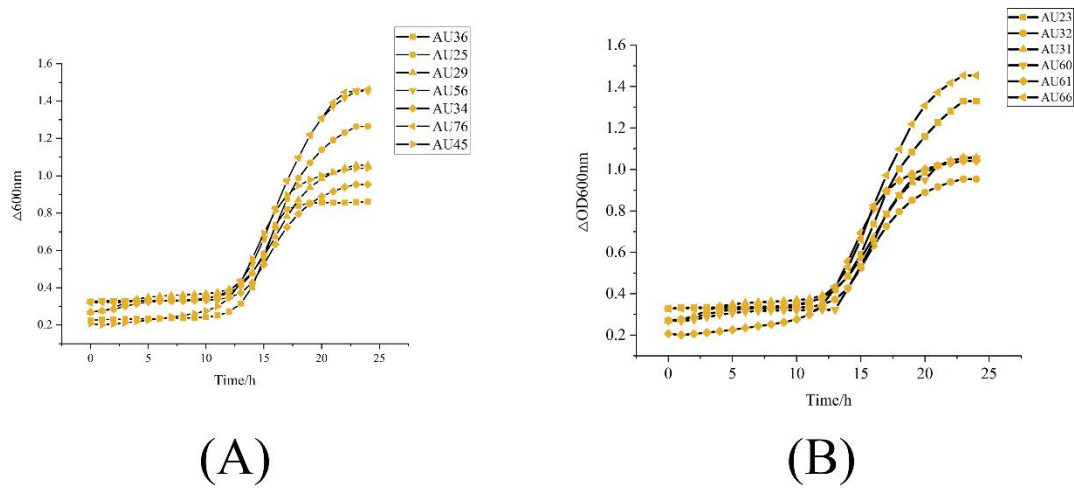

Figure S5: Growth curves of strains AU63, AU64, AU65, AU69 and AU79, (B) Growth curves of strains AU39, AU43, AU46, AU52, AU57, AU53 and AU59.

Title: Growth curves of strains in group 5

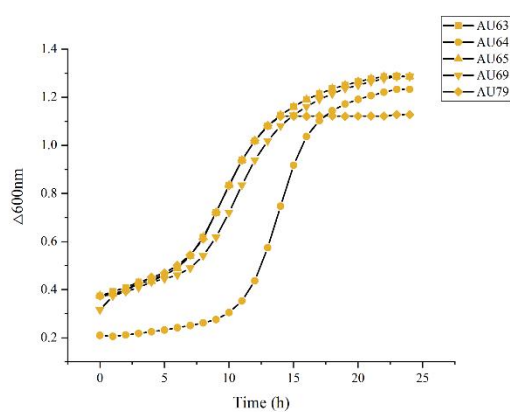

(A)

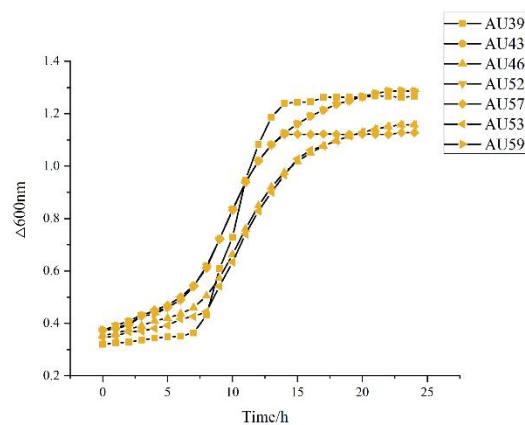

(B)

**Supplement Table S1: The Counts of Viable Bacteria of the Tested Strains**

| Strains | Bacteria Counts of OD <sub>600nm</sub> =0.8 (1mL) (CFU/mL) |
|---------|------------------------------------------------------------|
| AUc2301 | $1.02 \times 10^8$                                         |
| AU07    | $0.99 \times 10^8$                                         |
| AUY2301 | $1.06 \times 10^8$                                         |
| AU17    | $0.976 \times 10^8$                                        |
| AU41    | $0.88 \times 10^8$                                         |
| AU49    | $1.01 \times 10^8$                                         |
| AU50    | $0.921 \times 10^8$                                        |
| AU64    | $0.831 \times 10^8$                                        |
| LGG     | $0.925 \times 10^8$                                        |
